# Supplementary material for: Case report: binaural beats music assessment experiment
Source: PubMed Central journal article supplement (PMC10196448; doi:10.3389/fnhum.2023.1138650), 2023-05-05
Supplement: Data_Sheet_1.pdf [file Data_Sheet_1.pdf]

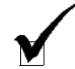

| Topic                            | Item | Checklist item description                                                                                       | Reported on Line                                      |
|----------------------------------|------|------------------------------------------------------------------------------------------------------------------|-------------------------------------------------------|
| Key Words<br><br>(no references) |      | The diagnosis or intervention of primary focus followed by the words "case report" . . . . .                     | 1                                                     |
|                                  | 2    | 2 to 5 key words that identify diagnoses or interventions in this case report, including "case report" . . .     | 1                                                     |
|                                  |      | Introduction: What is unique about this case and what does it add to the scientific literature? . . . . .        | 1                                                     |
|                                  |      | Main symptoms and/or important clinical findings . . . . .                                                       | 1                                                     |
|                                  | 3c   | The main diagnoses, therapeutic interventions, and outcomes . . . . .                                            | 1                                                     |
| Introduction Patient Information | 3d   | Conclusion—What is the main "take-away" lesson(s) from this case? . . . . .                                      | 1                                                     |
|                                  | 4    | One or two paragraphs summarizing why this case is unique ( <b>may include references</b> ) . . . . .            | 1                                                     |
|                                  | 5a   | De-identified patient specific information. . . . .                                                              | 13                                                    |
|                                  | 5b   | Primary concerns and symptoms of the patient. . . . .                                                            | 13                                                    |
| Clinical Findings                | 5c   | Medical, family, and psycho-social history including relevant genetic information . . . . .                      | 13                                                    |
|                                  | 5d   | Relevant past interventions with outcomes . . . . .                                                              | 13                                                    |
|                                  | 6    | Describe significant physical examination (PE) and important clinical findings. . . . .                          | No exam                                               |
|                                  | 7    | Historical and current information from this episode of care organized as a timeline . . . . .                   | 11                                                    |
| Timeline                         | 8a   | Diagnostic testing (such as PE, laboratory testing, imaging, surveys). . . . .                                   | 19                                                    |
|                                  |      | Diagnostic challenges (such as access to testing, financial, or cultural) . . . . .                              | none                                                  |
|                                  | 8c   | Diagnosis (including other diagnoses considered) . . . . .                                                       | 30                                                    |
|                                  | 8d   | Prognosis (such as staging in oncology) where applicable . . . . .                                               | no                                                    |
| Diagnostic Assessment            | 9a   | Types of therapeutic intervention (such as pharmacologic, surgical, preventive, self-care) . . . . .             | 30                                                    |
|                                  | 9b   | Administration of therapeutic intervention (such as dosage, strength, duration) . . . . .                        | 11                                                    |
|                                  | 9c   | Changes in therapeutic intervention (with rationale) . . . . .                                                   | 19                                                    |
| Therapeutic Intervention         | 10a  | Clinician and patient-assessed outcomes (if available) . . . . .                                                 | 30                                                    |
|                                  | 10b  | Important follow-up diagnostic and other test results . . . . .                                                  | No follow up                                          |
|                                  | 10c  | Intervention adherence and tolerability (How was this assessed?) . . . . .                                       | 19                                                    |
|                                  | 10d  | Adverse and unanticipated events . . . . .                                                                       | 19                                                    |
| Follow-up and Outcomes           | 11a  | A scientific discussion of the strengths AND limitations associated with this case report . . . . .              | 36                                                    |
|                                  | 11b  | Discussion of the relevant medical literature <b>with references</b> . . . . .                                   | 2                                                     |
|                                  | 11c  | The scientific rationale for any conclusions (including assessment of possible causes) . . . . .                 | 34                                                    |
|                                  | 11d  | The primary "take-away" lessons of this case report (without references) in a one paragraph conclusion . . . . . | 36                                                    |
| Discussion                       | 12   | The patient should share their perspective in one to two paragraphs on the treatment(s) they received . . . . .  | BMIS used                                             |
|                                  | 13   | Did the patient give informed consent? Please provide if requested . . . . .                                     | Yes <input type="checkbox"/> <input type="checkbox"/> |
| Patient Perspective              |      |                                                                                                                  |                                                       |
| Informed Consent                 |      |                                                                                                                  |                                                       |
