# Supplementary material for: Case report: binaural beats music assessment experiment
Source: PubMed Central journal article supplement (PMC10196448; doi:10.3389/fnhum.2023.1138650), 2023-05-05
Supplement: Image_1.pdf [file Image_1.pdf]

## **Brief Mood Introspection Scale (BMIS)**

Overall, my mood is:

Very Unpleasant

Very Pleasant

-10 -9 -8 -7 -6 -5 -4 -3 -2 -1 0 1 2 3 4 5 6 7 8 9 10

| <b>Brief Mood Introspection Scale (BMIS)</b> | <b>Session 1<br/>BN</b> | <b>Session 2<br/>BN + BB</b> | <b>Session 3<br/>MUSIC + BN + BB</b> | <b>Session 4<br/>MUSIC + BB</b> |
|----------------------------------------------|-------------------------|------------------------------|--------------------------------------|---------------------------------|
| <b>Subject 1</b>                             | 4                       | 6                            | 7                                    | 7                               |
| <b>Subject 2</b>                             | 0                       | 1                            | *                                    | *                               |
| <b>Subject 3</b>                             | -5                      | 4                            | -1                                   | 1                               |
| <b>Subject 4</b>                             | 8                       | 7                            | 8                                    | 8                               |

BN = Brown Noise BB= Binaural Beats \*= not obtained Red = unexpected data
