# Supplementary material for: Case report: binaural beats music assessment experiment
Source: PubMed Central journal article supplement (PMC10196448; doi:10.3389/fnhum.2023.1138650), 2023-05-05
Supplement: Image_2.pdf [file Image_2.pdf]

| <b>MENLASCAN RESULTS<br/>SUBJECT 1</b>               | <b>MICROCIRCULATION<br/>SCORE</b> | <b>CARDIOVASCULAR<br/>SCORE</b> |
|------------------------------------------------------|-----------------------------------|---------------------------------|
| BASELINE                                             | 34                                | 10                              |
| CONDITION 1<br>AFTER BROWN NOISE                     | 20                                | <b>50</b>                       |
| <b>CONDITION 1 AFTER BN &amp; BB</b>                 | <b>31</b>                         | <b>50</b>                       |
| BASELINE                                             | 33                                | 18                              |
| CONDITION 2<br>AFTER MUSIC & BN                      | 26                                | 30                              |
| <b>CONDITION 2 AFTER MUSIC &amp; BN<br/>&amp; BB</b> | <b>46</b>                         | <b>28</b>                       |
| <b>MENLASCAN RESULTS<br/>SUBJECT 2</b>               | <b>MICROCIRCULATION<br/>SCORE</b> | <b>CARDIOVASCULAR<br/>SCORE</b> |
| BASELINE                                             | 54                                | 95                              |
| CONDITION 1<br>AFTER BROWN NOISE                     | 52                                | 95                              |
| <b>CONDITION 1 AFTER BN &amp; BB</b>                 | <b>47</b>                         | <b>75</b>                       |
| BASELINE                                             | 63                                | 95                              |
| CONDITION 2<br>AFTER MUSIC & BN                      | 54                                | 85                              |

|                                                  |                               |                             |
|--------------------------------------------------|-------------------------------|-----------------------------|
| <b>CONDITION 2 AFTER MUSIC &amp; BN &amp; BB</b> | <b>58</b>                     | <b>95</b>                   |
| <b>MENLASCAN RESULTS SUBJECT 3</b>               | <b>MICROCIRCULATION SCORE</b> | <b>CARDIOVASCULAR SCORE</b> |
| BASELINE                                         | 34                            | 10                          |
| CONDITION 1 AFTER BROWN NOISE                    | 20                            | 50                          |
| <b>CONDITION 2 AFTER BN &amp; BB</b>             | <b>31</b>                     | <b>50</b>                   |
| BASELINE                                         | 74                            | 73                          |
| CONDITION 3 AFTER MUSIC & BN                     | 62                            | 71                          |
| <b>CONDITION 4 AFTER MUSIC &amp; BN &amp; BB</b> | <b>20</b>                     | <b>83</b>                   |
| <b>MENLASCAN RESULTS SUBJECT 4</b>               | <b>MICROCIRCULATION SCORE</b> | <b>CARDIOVASCULAR SCORE</b> |
| BASELINE                                         | 40                            | 75                          |
| CONDITION 1 AFTER BROWN NOISE                    | 41                            | 65                          |
| <b>CONDITION 2 AFTER BN &amp; BB</b>             | <b>35</b>                     | <b>81</b>                   |
| BASELINE                                         | 43                            | 83                          |

|                                                            |           |           |
|------------------------------------------------------------|-----------|-----------|
| CONDITION 3<br>AFTER MUSIC & BN                            | 37        | 73        |
| <b>CONDITION 4</b><br><b>AFTER MUSIC &amp; BN &amp; BB</b> | <b>40</b> | <b>85</b> |

**NOTE:** All Binaural Beats results are highlighted in **bold**. We are expecting all results to increase showing increased bloodflow and relaxation. Unexpected results that lower instead of raise are highlighted in **red**.

The Menlascan results provided us with measurements on the cardiovascular system, which refers to the heart (cardio) and blood vessels (vascular). This system distributes blood to all parts of the body, and is governed by the autonomic nervous system (ANS). The ANS is a component of the peripheral nervous system that regulates involuntary physiologic processes including heart rate, blood pressure, respiration, digestion, and sexual arousal (<https://www.ncbi.nlm.nih.gov/books/NBK539845/>). Microcirculation is blood flow through the smallest vessels of the cardiovascular system. The most important results here are the improvement of cardiovascular and microcirculation scores as the ANS is prone to rapid changes with emotions.

Subject 1 had the highest microcirculation score with music + BB on day 1, and on day 2 an increased cardiovascular score from music + BB (although just music increased cardiovascular as well). In subject 2, day 1 shows no improvement with adding the BB. On day 2, Music + BB increase the cardiovascular and microcirculation score. In Subject 3, our introverted subject, we see the least effect, with BN and BN + BB increasing only cardiovascular score on day 1, and on day 2, music + BB provide a mild cardiovascular improvement only. In subject 4, there is a mild improvement only in cardiovascular when adding BB, and on day 2, has a mild improvement in cardiovascular. There is a mild increase in relaxation metrics such as cardiovascular and microcirculation scores, however there is not enough data to be conclusive. The sponsor hopes to model an excellent method for studying the effects of binaural beats on the cardiovascular system, but a larger sample size is needed for any true narrative to be discovered.
